# Supplementary material for: Biocompatible quaternary pullulan functionalized 2D MoS2 glycosheet-based non-leaching and infection-resistant coatings for indwelling medical implants
Source: Royal Society of Chemistry journal article supplement (doi:10.1039/d3tb01816d), 2023-01-01
Supplement: d3tb01816d1.pdf [file d3tb01816d1.pdf]

## Supporting Information

### **Biocompatible Quaternary Pullulan functionalized 2D MoS<sub>2</sub> Glycosheet-based Non-leaching & Infection-resistant Coatings for Indwelling Medical Implants**

*Shounak Roy*<sup>1#</sup>, *Prakash Haloi*<sup>2,3#</sup>, *B. Siva Lokesh*<sup>2,3</sup>, *Saurabh Chawla*<sup>2,3</sup>, *V.*

*Badireenath Konkimalla*<sup>2,3\*</sup> and *Amit Jaiswal*<sup>1\*</sup>

<sup>1</sup>School of Biosciences and Bioengineering, Indian Institute of Technology Mandi,  
Kamand, Mandi, Himachal Pradesh 175005, India

<sup>2</sup>School of Biological Sciences, National Institute of Science Education and  
Research, HBNI, Jatni, Odisha 752050, India

<sup>3</sup>Homi Bhabha National Institute, Training School Complex, Anushakti Nagar,  
Mumbai 400094, India

Email: [j.amit@iitmandi.ac.in](mailto:j.amit@iitmandi.ac.in)

[badireenath@niser.ac.in](mailto:badireenath@niser.ac.in)

\* Corresponding Author

# Equal Contribution

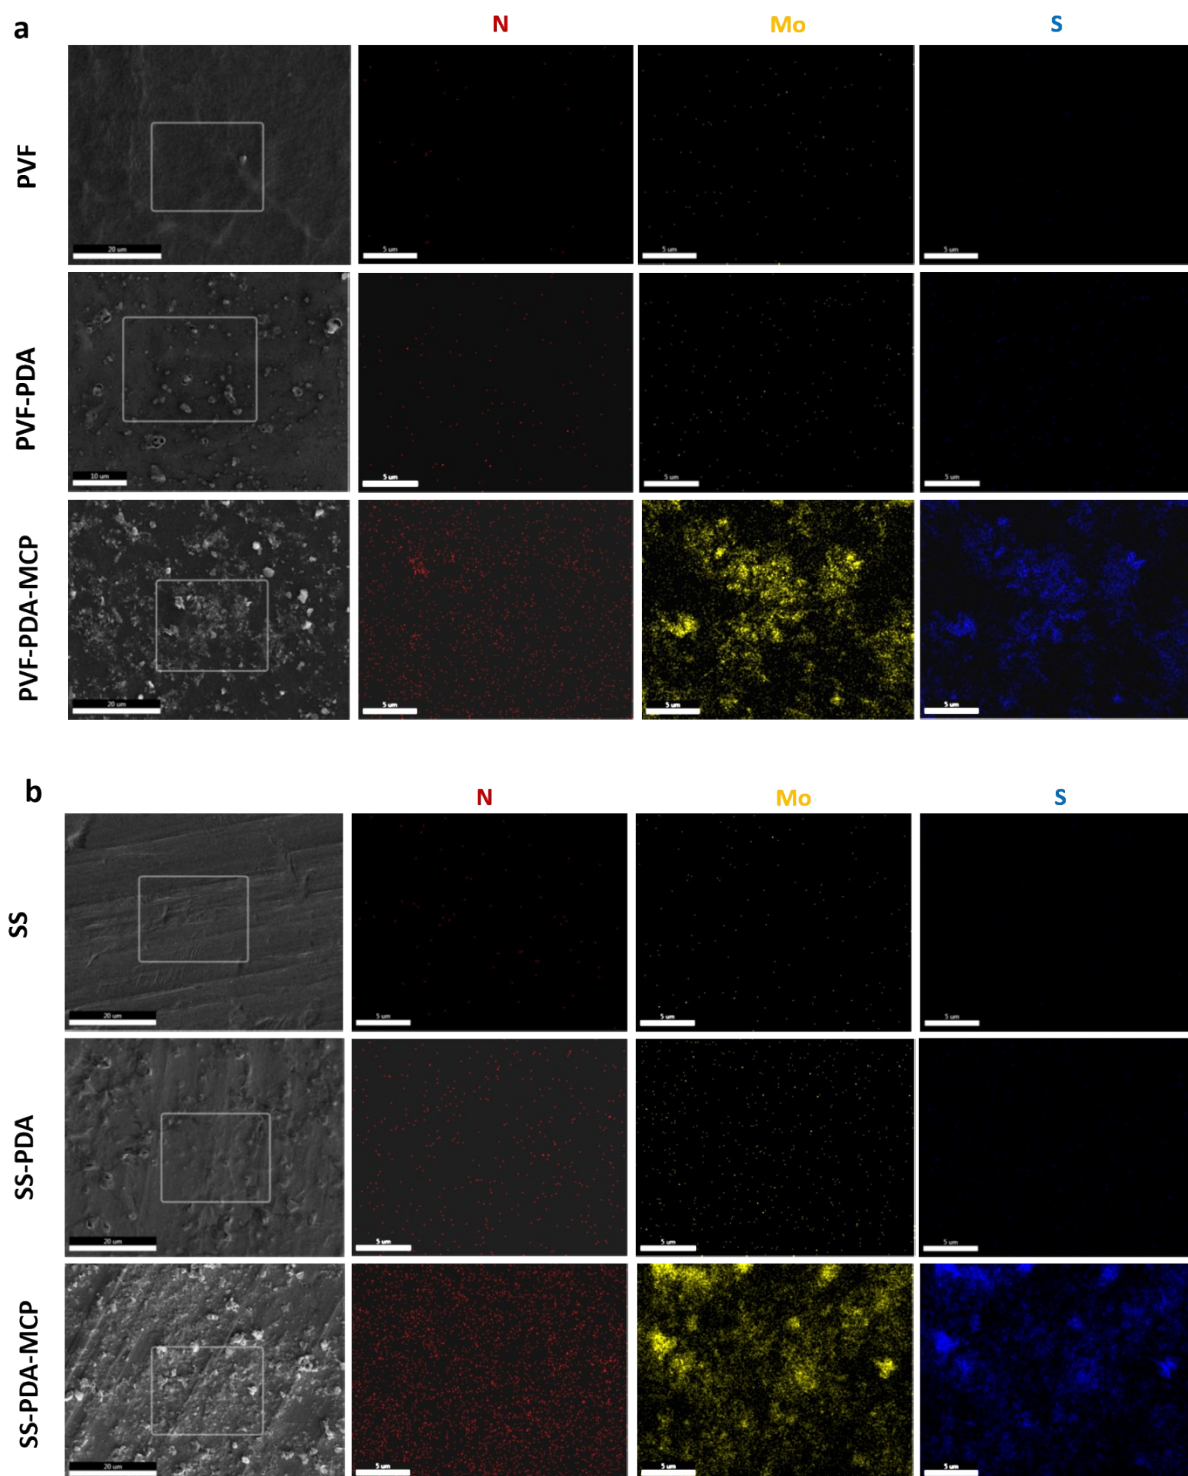

**Fig. S1.** EDX mapping of (a) PVF, PVF-PDA and PVF-PDA-MCP and (b) SS, SS-PDA and SS-PDA-MCP substrates.

Deconvoluted N1s of SS-PDA-MCP

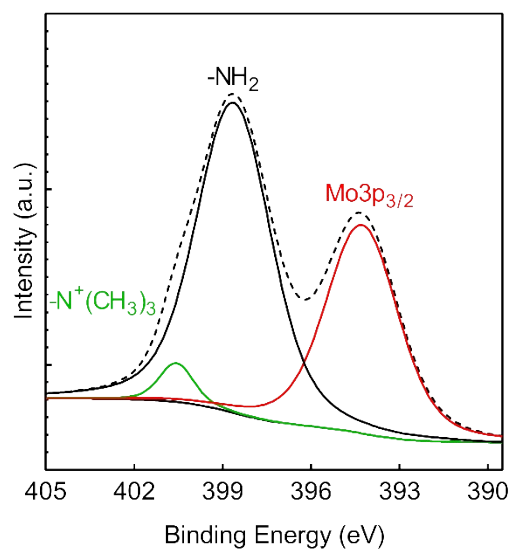

**Fig. S2.** Deconvoluted N1s spectra of SS-PDA-MCP.
